# Supplementary material
Source: HighWire-hosted journal article supplement (https://www.cmajopen.ca/highwire/filestream/80847/field_highwire_adjunct_files/0/open-2016-0030-1-at.pdf)
Supplement: open-2016-0030-1-at.pdf [file open-2016-0030-1-at.pdf]

**Appendix 1 (as supplied by the authors): Interview Guide**

| <b>Topic</b>                          | <b>Question</b>                                                                                                                                                                                                                                                                                              | <b>Follow-up/Probe</b>                                                                                                                                                                                                                                                                                                                                                                                                                                                                                                                                                               |
|---------------------------------------|--------------------------------------------------------------------------------------------------------------------------------------------------------------------------------------------------------------------------------------------------------------------------------------------------------------|--------------------------------------------------------------------------------------------------------------------------------------------------------------------------------------------------------------------------------------------------------------------------------------------------------------------------------------------------------------------------------------------------------------------------------------------------------------------------------------------------------------------------------------------------------------------------------------|
| <b>Illness experience</b>             | Tell me about your experience living with _____ (heart disease, diabetes, stroke, hypertension)?                                                                                                                                                                                                             | When were you diagnosed?<br>What impact has it had on your life?<br>What are the challenges you've faced?<br>How did you cope with these?                                                                                                                                                                                                                                                                                                                                                                                                                                            |
| <b>Financial barrier experience</b>   | 1. You previously stated that you have had difficulty accessing care due to cost. Please tell me about that...<br><br>2. Did you experience any health-related consequences due to your financial barrier?<br><br>3. What are the personal, emotional and psychological impact of having financial barriers? | Tell me about the financial repercussions of your chronic disease.<br>How has your financial situation changed since diagnosis?<br>What exactly did you have difficulty accessing?<br>Did you ever not get what you needed due to cost?<br>What are your out of pocket costs for your chronic diseases each month?<br><br>Have you ever had to stop taking medications due to cost?<br>Has this barrier ever led to you having to go to the hospital?<br><br>Family? Work-life balance? Stress?<br>How would things in your life be different if you didn't have financial barriers? |
| <b>Reasons for financial barriers</b> | What things led you to have financial difficulties?                                                                                                                                                                                                                                                          | Employment status?<br>Personal debts?<br>Do you have health insurance?<br>If no, why do you not have health insurance?<br>If yes, why do you still have financial barriers? Do you have copayments?                                                                                                                                                                                                                                                                                                                                                                                  |
| <b>Coping</b>                         | How do you deal with your chronic disease and financial difficulties?                                                                                                                                                                                                                                        | What kinds of things do you do ensure you are able to get the care you require?<br>Have you tried to access financial supports for assistance?<br>How aware are your family members and friends of your financial situation?<br>How aware are your healthcare providers of your financial situation?                                                                                                                                                                                                                                                                                 |
| <b>Suggestions</b>                    | What might be done to improve the situation for people like yourself?                                                                                                                                                                                                                                        | Government programs?<br>Other programs or initiatives?                                                                                                                                                                                                                                                                                                                                                                                                                                                                                                                               |
